# Supplementary material for: The Mini-International Neuropsychiatric Interview is useful and well accepted as part of the clinical assessment for depression and anxiety in primary care: a mixed-methods study
Source: Springer Nature journal article supplement (doi:10.1186/s12875-017-0674-5), 2018-01-23
Supplement: MOESM1 [file 15412450]

## Additional File 1. Questionnaires and topic guides

**Table 5.** Items in the patient and interviewer acceptance questionnaires [8]

### **Patients**

1. the procedure used by the interviewer was helpful
2. I feel more confused than before the interview
3. I felt interrogated
4. there were too many questions
5. the interview was exhausting
6. I think that the interviewer took my problems seriously
7. the relationship to the interviewer was positive
8. I didn't report everything that was bothering me
9. after the interview I have a better understanding of myself and my problems
10. I think that the interviewer asked for enough detail to get an appropriate understanding of my situation

### **Interviewers**

1. I conducted the interview as well as I could
2. I found it difficult to get all the relevant information needed to clarify the diagnostic picture
3. While conducting the interview I felt competent
4. I made mistakes in administering the interview
5. the patient perceives himself/herself and his/her problems in a differentiated manner
6. the relationship to the patient was positive
7. I think that the patient did not report everything that was bothering him/her
8. the interview was exhausting
9. during the interview I experienced the patient as cooperative
10. I succeeded in being responsive to the patient

**Table 6.** Topic guides for the interviews and focus groups discussions about use of MINI in primary care (probing questions in italics)

**Interview with patients**

What happened when you met with the GP?

*Why did the GP refer you to a psychologist?*

*How did you feel about being referred for an assessment?*

*Did the referral affect your confidence in the GP? How?*

*How has your relationship with your GP been affected by the referral?*

What were your experiences from visiting the psychologist?

*What experiences did you have of the psychologist reading aloud from a questionnaire with fixed yes- and no- responses?*

*Did you experience any problems, answering the questions? Please describe*

*Did you recognize yourself in any of the questions? Please describe*

When you met with the GP again, what happened?

*Did the GP refer to the result of the MINI-assessment? Please describe.*

*Did you perceive that the GP had understood you and your problems? Please describe.*

*Do you give the same information to the GP and the psychologist\*? What are the differences?*

What pros' and cons' did you see with the referral?

**Focus group discussions with GPs\*\***

Discuss about experiences from the referral

*Which patients were referred? And which were not? Why?*

*How were the patients' attitudes towards being referred? How do you perceive that the referral changed their confidence in you (capture both relationship and competence)?*

Discuss about experiences of using the results from MINI

*How did you use the feedback from the psychologist\*?*

*What do you think about the accuracy of MINI?*

Discuss the values of using MINI for GPs and patients

*What pros' and cons' do you see using MINI as part of diagnosis in primary care? Would you like to continue using it?*

*What pros' and cons' do you see referring to a psychologist\*? Would you like to continue?*

**Interview with psychologists**

What are your experiences of using MINI?

*When do you use MINI?*

*What works well and what does not work well?*

*How do you perceive that patients' feel about you using MINI?*

What are your experiences with MINI?

*How do you perceive the structure of MINI and how does the patient perceive it?*

*How do you perceive the individual items?*
